# Supplementary material
Source: PubMed Central journal article supplement (PMC3510675)
Supplement: NIHMS422216-supplement-01.pdf [file NIHMS422216-supplement-01.pdf]

## SUPPLEMENTAL MATERIAL

**Supplement Method.** Strategy of literature search for prospective studies that examined the association between circulating 25(OH)-vitamin D concentrations and risk of cardiovascular disease.

Published articles from 1966 through February 2012 were identified through search of MEDLINE and EMBASE. The same search strategy was applied to each electronic database. Search terms were selected based on analysis of the Medical Subject Headings and text words from *a priori* identified key articles.

Search terms used for vitamin D included plasma vitamin D, serum vitamin D, circulating vitamin D, 25-hydroxy vitamin D, 1,25-dihydroxy vitamin D, calcidiol, and calcitriol, combined with “OR”.

Search terms used for CVD included cardiovascular disease, ischemic heart disease, coronary artery disease, cardiovascular mortality, myocardial infarction, and stroke, combined with “OR”.

The search results using vitamin D related terms and CVD related terms were then combined using “AND”.

The search results were further restricted to English-language articles, human studies, and adult subjects aged  $\geq 18$  years.

The reference lists of selected articles were also manually searched for additional studies.

**Supplement Table.** Characteristics of the selected prospective studies of circulating 25(OH)-vitamin D levels in association with risk of cardiovascular disease (CVD)

| Source                                | Country       | Study Design        | Study Population                 |                            |                                                                                 |                        | Follow-up, y     | CVD endpoint                                       |
|---------------------------------------|---------------|---------------------|----------------------------------|----------------------------|---------------------------------------------------------------------------------|------------------------|------------------|----------------------------------------------------|
|                                       |               |                     | Age, y                           | Source Cohort              | Characteristics                                                                 | N, gender              |                  |                                                    |
| Marniemi et al, <sup>15</sup> 2005    | Finland       | Cohort              | 65-99                            |                            | Residents in the city of Turku and surrounding rural areas                      | 361 men<br>394 women   | 10<br>(maximum)  | Incident MI<br>Incident stroke                     |
| Wang et al, <sup>11</sup> 2008        | United States | Cohort              | 59±9                             | Framingham Offspring Study | Offspring and their spouses of the original Framingham Heart Study participants | 792 men<br>947 women   | 5.4<br>(mean)    | Incident CVD                                       |
| Giovannucci et al, <sup>12</sup> 2008 | United States | Nested case-control | 63.8±8.6                         | HPFS                       | US male health professionals                                                    | 1354 men               | 10               | Incident MI                                        |
| Dobnig et al, <sup>13</sup> 2008      | Germany       | Cohort              | 62±10                            | LURIC                      | Patients referred for coronary angiography                                      | 2268 men<br>990 women  | 7.7<br>(median)  | CVD mortality                                      |
| Pilz et al, <sup>24</sup> 2008        | Germany       | Cohort              | 61.8                             | LURIC                      | Patients referred for coronary angiography                                      | 3299 men and women     | 7.7<br>(median)  | Stroke mortality                                   |
| Pilz et al, <sup>25</sup> 2008        | Germany       | Cohort              | 62±11 for men<br>65±10 for women | LURIC                      | Patients referred for coronary angiography                                      | 3299 men and women     | 7.7<br>(median)  | CVD mortality                                      |
| Melamed et al, <sup>16</sup> 2008     | United States | Cohort              | ≥20                              | NHANES III                 | Nationally representative adults                                                | 6061 men<br>7270 women | 8.7<br>(median)  | CVD mortality                                      |
| Pilz et al, <sup>14</sup> 2009        | Netherlands   | Cohort              | 50-75                            | Hoorn Study                | Residents of town of Hoorn                                                      | 303 men<br>311 women   | 6.2<br>(mean)    | CVD mortality                                      |
| Ginde et al, <sup>26</sup> 2009       | United States | Cohort              | 73±0.2                           | NHANES III                 | Noninstitutionalized US adults ≥65 y                                            | 1500 men<br>1908 women | 7.3<br>(median)  | CVD mortality                                      |
| Kilkkinen, et al, <sup>27</sup> 2009  | Finland       | Cohort              | 49.4±13.6                        | Mini-Finland Health Survey | Nationally representative adults ≥30 y                                          | 2817 men<br>3402 women | 27.1<br>(median) | CVD mortality<br>CHD mortality<br>Stroke mortality |
| Bolland et al, <sup>28</sup> 2010     | New Zealand   | Cohort              | 74±4                             |                            | Healthy community-dwelling women                                                | 1471 women             | 5                | Total CVD<br>MI<br>Stroke<br>CVD mortality         |
| Semba, et al, <sup>29</sup> 2010      | Italy         | Cohort              | ≥65                              | InCHIANTI                  | Residents in two towns in Tuscany                                               | 755 men<br>251 women   | 6.5              | CVD mortality                                      |

|                                           |               |                     |                 |                                 |                                                            |                        |                              |                                             |
|-------------------------------------------|---------------|---------------------|-----------------|---------------------------------|------------------------------------------------------------|------------------------|------------------------------|---------------------------------------------|
| Fiscella et al, <sup>30</sup><br>2010     | United States | Cohort              | 43.6            | NHANES III                      | Nationally representative adults $\geq 18$ y               | 15,363 men and women   | 9.0 (mean)                   | CVD mortality                               |
| Anderson et al, <sup>31</sup><br>2010     | United States | Cohort              | 66.6 $\pm$ 10.8 | Intermountain Healthcare system | General healthcare population                              | 20,069 men and women   | 1.3 (mean)<br>9.3 (maximum)  | Incident MI<br>Incident stroke<br>Composite |
| Cawthon et al, <sup>32</sup><br>2010      | United States | Cohort              | $\geq 65$       | MrOS                            | Community-dwelling US men $\geq 65$ y                      | 1490 men               | 7.3 (mean)                   | CVD mortality <sup>c</sup>                  |
| Michaelsson et al, <sup>33</sup><br>2010  | Sweden        | Cohort              | 71 $\pm$ 0.6    | ULSAM                           | Residents living in Uppsala                                | 1194 men               | 12.7 (median)                | CVD mortality                               |
| Hutchinson et al, <sup>34</sup><br>2010   | Norway        | Cohort              | 58.9 $\pm$ 10.2 | Tromso Study                    | Residents of city of Tromso                                | 7161 men and women     | 11.7 (mean)                  | CVD mortality                               |
| Jassal et al, <sup>35</sup><br>2010       | United States | Cohort              | 74              | Rancho Bernardo Study           | Community-dwelling adults living in South California       | 411 men and 662 women  | 6.4 (mean)<br>10.4 (maximum) | CVD mortality                               |
| Messenger et al, <sup>36</sup><br>2011    | United States | Cohort              | 76.4            | MrOS                            | Community-dwelling US men $\geq 65$ y                      | 3094 men               | 4.4 (median)                 | Total CVD                                   |
| Hosseinpanah et al, <sup>41</sup><br>2011 | Iran          | Nested case-control | 56.8 $\pm$ 11.2 | Tehran Lipid and Glucose Study  | Representative sample of Tehranian adults                  | 258 men<br>244 women   | 5.7                          | Incident CVD                                |
| Eaton et al, <sup>37</sup><br>2011        | United States | Cohort              | 65.7            | WHI                             | Postmenopausal US women aged 50-79 y                       | 2429 women             | >10.5                        | CVD mortality                               |
| Kestenbaum et al, <sup>38</sup><br>2011   | United States | Cohort              | 73.7            | CHS                             | Ambulatory men and women aged $\geq 65$ y                  | 701 men<br>1611 women  | 14.0 (median)                | Incident CVD                                |
| Deo et al, <sup>39</sup><br>2012          | United States | Cohort              | 73.2            | CHS                             | Ambulatory men and women aged $\geq 65$ y                  | 697 men<br>1615 women  | 14.0 (median)                | Sudden cardiac death                        |
| Michos et al, <sup>40</sup><br>2012       | United States | Cohort              | 48.8            | NHANES III                      | Nationwide noninstitutionalized US adults aged $\geq 30$ y | 3654 men<br>4327 women | 14.1 (median)                | Stroke mortality                            |

Abbreviations: CVD, cardiovascular disease; MI, myocardial infarction; HPFS, Health Professionals Follow-up Study; LURIC, Ludwigshafen Risk and Cardiovascular Health; NHANES III: the Third National Health and Nutrition Examination Survey; InCHIANTI: Aging in the Chianti Area; MrOS: Osteoporotic Fractures in Men; ULSAM: Uppsala Longitudinal Study of Adult Men; WHI: Women's Health Initiative; CHS: Cardiovascular Health Study.
